# Supplementary material for: [Retracted] Effects of Torreya grandis Kernel Oil on Lipid Metabolism and Intestinal Flora in C57BL/6J Mice
Source: Hindawi journal article supplement (doi:10.1155/2022/4472751), 2022-01-01
Supplement: f1 [file 4472751.f1.pdf]

# Supplemental figures

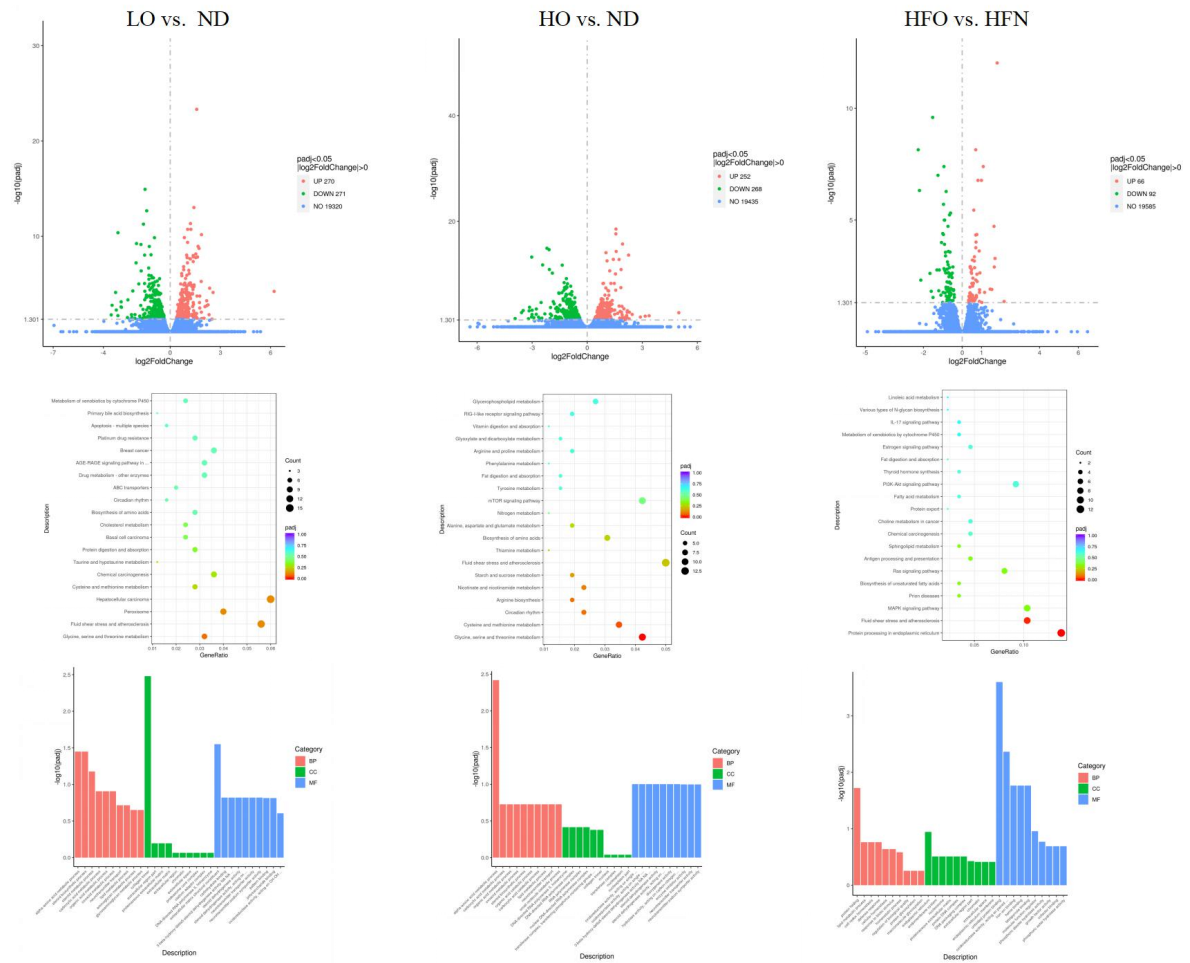

**Fig. S1.** Alterations of gene expression in TMO treated liver. (a) Volcano plot showing the changes of liver genes (fold change  $\geq 2$ ),  $n=4$  for each group; (b) KEGG pathway enrichment analysis of the differentially expressed genes,  $n=4$  for each group; (c) GO enrichment analysis of the differentially expressed genes,  $n=4$  for each group.

LO vs. ND (POS)

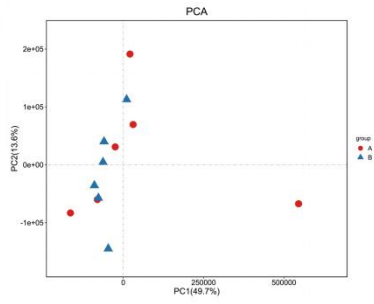

LO vs. ND (NEG)

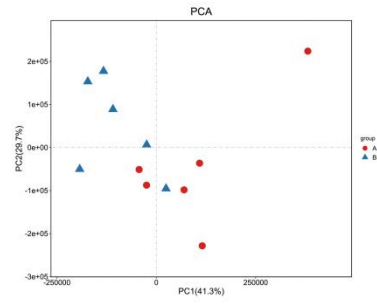

HO vs. ND (POS)

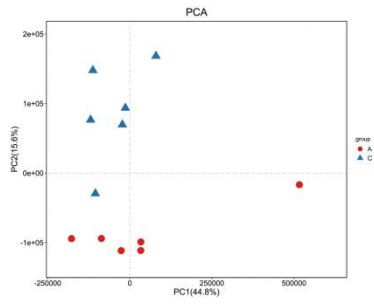

HO vs. ND (NEG)

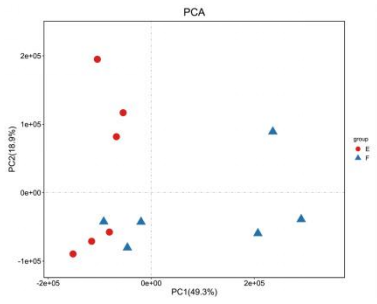

HFO vs. HFN (POS)

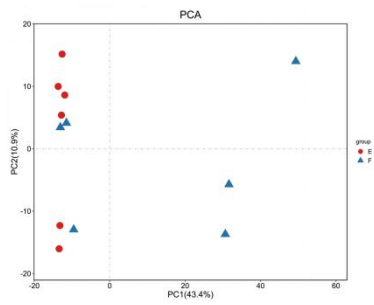

HFO vs. HFN (NEG)

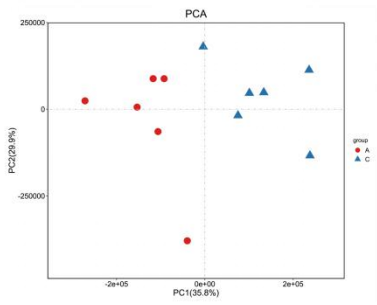

Fig. S2. Different groups of liver metabolites visualized using PCA score plots.

S3

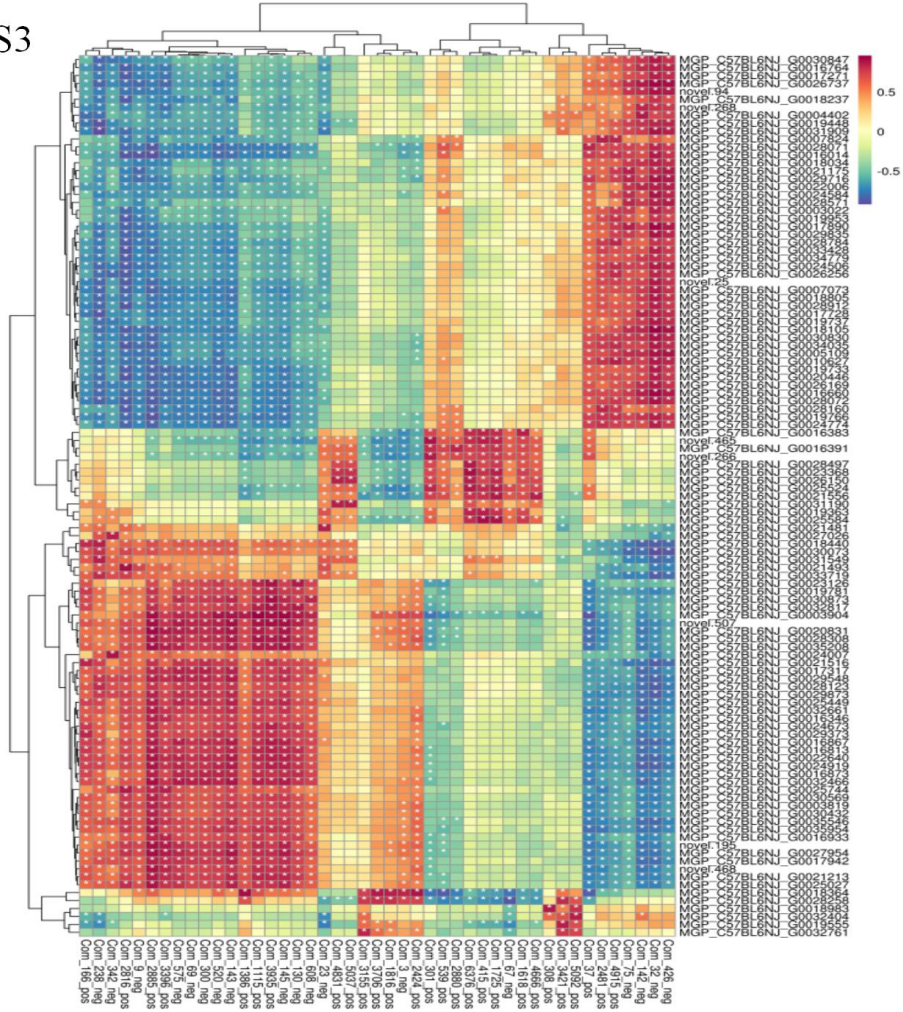

Fig. S3. Heat map of correlation between differential gene expression and abundance of differential metabolites.

## Supplementary Tables

Supplementary TABLE 1. Nutrient and energy supply levels of basal, high fat feed

| Nutrient         | Levels (g/100g) |               | Items        | Levels (Kcal/Kg) |               |
|------------------|-----------------|---------------|--------------|------------------|---------------|
|                  | Basal feed      | High fat feed |              | Basal feed       | High fat feed |
| Crude protein    | 18.8            | 22.5          | Total energy | 3660             | 4608          |
| Crude fat        | 5.2             | 24.2          | Protein      | 752              | 900           |
| Crude fiber      | 3.0             | 3.2           | Fat          | 468              | 2174          |
| Crude ash        | 5.4             | 5.6           | Carbohydrate | 2440             | 1534          |
| Calcium          | 1.1             | 1.2           |              |                  |               |
| Total phosphorus | 0.7             | 0.8           |              |                  |               |

Supplementary TABLE 2. Percentage of liver lipid droplet area in each group

| Group | Relative content (%) | Pixel area of lipid droplets | Proportion of positive area (%) |
|-------|----------------------|------------------------------|---------------------------------|
| ND    | 1474560              | 185880.00±21114.09           | 12.61±1.43                      |
| LO    | 1474560              | 379703.00±43625.36           | 25.75±2.96 <sup>##</sup>        |
| HO    | 1474560              | 50274.00±12485.43            | 3.41±0.85 <sup>##</sup>         |
| HFN   | 1474560              | 857495.33±51797.85           | 58.15±3.51                      |
| HFO   | 1474560              | 808987.33±104562.93          | 56.62±5.27                      |

Supplementary TABLE 3. Summary table of common pathways of different genes and different metabolites among groups.

| Treat       | Pathway ID | Pathway                                          | DEGs | SCMs |
|-------------|------------|--------------------------------------------------|------|------|
|             | ko01100    | Metabolic pathways                               | 29   | 6    |
|             | ko05146    | Amoebiasis                                       | 4    | 1    |
|             | ko01040    | Biosynthesis of unsaturated fatty acids          | 2    | 4    |
|             | ko00590    | Arachidonic acid metabolism                      | 3    | 1    |
|             | ko00591    | Linoleic acid metabolism                         | 2    | 2    |
|             | ko04750    | Inflammatory mediator regulation of TRP channels | 3    | 1    |
|             | ko00592    | Alpha-Linolenic acid metabolism                  | 1    | 1    |
|             | ko04726    | Serotonergic synapse                             | 2    | 1    |
|             | ko04611    | Platelet activation                              | 2    | 1    |
|             | ko00230    | Purine metabolism                                | 2    | 1    |
| LO vs. ND   | ko04730    | Long-term depression                             | 1    | 1    |
|             | ko04913    | Ovarian Steroidogenesis                          | 1    | 1    |
|             | ko04664    | Fc epsilon RI signaling pathway                  | 1    | 1    |
|             | ko00480    | Glutathione metabolism                           | 1    | 1    |
|             | ko05140    | Leishmaniasis                                    | 1    | 1    |
|             | ko04912    | GnRH signaling pathway                           | 1    | 1    |
|             | ko04666    | Fc gamma R-mediated phagocytosis                 | 1    | 1    |
|             | ko04925    | Aldosterone synthesis and secretion              | 1    | 1    |
|             | ko04270    | Vascular smooth muscle contraction               | 1    | 1    |
|             | ko04723    | Retrograde endocannabinoid signaling             | 1    | 1    |
|             | ko01200    | Carbon metabolism                                | 1    | 1    |
|             | ko04921    | Oxytocin signaling pathway                       | 1    | 1    |
|             | ko01100    | Metabolic pathways                               | 40   | 6    |
|             | ko01040    | Biosynthesis of unsaturated fatty acids          | 3    | 3    |
|             | ko01230    | Biosynthesis of amino acids                      | 5    | 1    |
| HO vs. ND   | ko00250    | Alanine, aspartate and glutamate metabolism      | 2    | 1    |
|             | ko00360    | Phenylalanine metabolism                         | 1    | 1    |
|             | ko00591    | Linoleic acid metabolism                         | 1    | 1    |
|             | ko00310    | Lysine degradation                               | 1    | 1    |
|             | ko00230    | Purine metabolism                                | 2    | 3    |
|             | ko04976    | Bile secretion                                   | 1    | 1    |
| HFO vs. HFN | ko00591    | Metabolic pathways                               | 3    | 12   |
|             | ko04742    | Taste transduction                               | 1    | 1    |

---

|         |                                  |   |   |
|---------|----------------------------------|---|---|
| ko04974 | Protein digestion and absorption | 1 | 1 |
| ko01100 | Linoleic acid metabolism         | 1 | 1 |

---
